# Supplementary material for: Fundraising Appeals for the COVID-19 Epidemic Fight: A Cross-Country Study of Donor Responses
Source: MDPI journal article supplement (doi:10.3390/su14116486), 2022-05-25
Supplement: s1 [file s1]

## Supplementary file

### Measurement items

| Constructs                                                              | Items | Measurements                                                                                                |
|-------------------------------------------------------------------------|-------|-------------------------------------------------------------------------------------------------------------|
| Humanitarian projects (HUP)                                             | HUP1  | I choose to donate because of the humanitarian project type for those affected by COVID-19                  |
|                                                                         | HUP2  | I chose to donate because of the location of the humanitarian project for those affected by COVID-19.       |
|                                                                         | HUP3  | I chose to donate because of attachment to the humanitarian project for those affected by COVID-19.         |
|                                                                         | HUP4  | I prefer to donate to the human welfare humanitarian project for those affected by COVID-19.                |
|                                                                         | HUP5  | I prefer to donate to a single humanitarian project rather than fundraising for those affected by COVID-19. |
| Non-governmental organizations (NPO)                                    | NPO1  | I donate only to familiar NPO or charities.                                                                 |
|                                                                         | NPO2  | I donate only to NPOs or charities s that have a good track record.                                         |
|                                                                         | NPO3  | I donate only to charitable organization that transparent in managing money donation.                       |
|                                                                         | NPO4  | I donate only to charitable organization that frequently update their information.                          |
|                                                                         | NPO5  | I donate only to a charitable organization that I have attached to it.                                      |
| IT-features (ITF)                                                       | ITF1  | I am concerned about online transaction security.                                                           |
|                                                                         | ITF2  | I am concerned about online transaction reliability.                                                        |
|                                                                         | ITF3  | I am concerned about online transaction trustworthiness.                                                    |
|                                                                         | ITF4  | I am concerned about online transaction privacy.                                                            |
|                                                                         | ITF5  | I am concerned about online transaction effectiveness.                                                      |
| SNS-features (SNS)                                                      | SNS1  | I donate only to the familiar SNS.                                                                          |
|                                                                         | SNS2  | I donate on the basis of the way information presented by SNS.                                              |
|                                                                         | SNS3  | I donate only to user-friendly SNS feature.                                                                 |
|                                                                         | SNS4  | I donate only if SNS communication features fully utilized.                                                 |
|                                                                         | SNS5  | I donate only if SNS features are interactive.                                                              |
| Religiosity (REL)                                                       | REL1  | I regularly offer prayer five times a day.                                                                  |
|                                                                         | REL2  | I fast regularly during Ramadan.                                                                            |
|                                                                         | REL3  | I regularly recite the Holy Quran.                                                                          |
|                                                                         | REL4  | I regularly donate and pay Zakah for those less fortunate, especially those affected by COVID-19.           |
|                                                                         | REL5  | I try to follow Islamic conjunctions in all matters in my life.                                             |
|                                                                         | REL6  | I always try to avoid minor and major sins.                                                                 |
| Attitude toward online monetary donation (ATT)                          | ATT1  | Donating online for those affected by COVID-19 is not generally problematic.                                |
|                                                                         | ATT2  | Donating online for those affected by COVID-19 is generally secure.                                         |
|                                                                         | ATT3  | Donating online for those affected by COVID-19 is generally easy to use.                                    |
|                                                                         | ATT4  | Donating online for those affected by COVID-19 is generally inconvenient.                                   |
| Monetary donation intentions via SNSs for COVID-19 epidemic fight (INT) | INT1  | I have an intention to donate via SNSs for those affected by COVID-19.                                      |
|                                                                         | INT2  | I have an intention to donate via SNSs for those affected by COVID-19 in the near future.                   |
|                                                                         | INT3  | I plan to donate actively via SNSs for those affected by COVID-19 in the near future.                       |
|                                                                         | INT4  | I have an intention to donate via SNSs for those affected by COVID-19 if I have a chance to do so.          |
|                                                                         | INT5  | I have an intention to donate via SNSs for those affected by COVID-19 more than other means.                |
